# Supplementary material for: CO2 electroreduction on nano-Cu-ZIF grown inside activated carbon: experimental and computational aspects
Source: Royal Society of Chemistry journal article supplement (doi:10.1039/d6na00256k), 2026-06-08
Supplement: d6na00256k1.pdf [file d6na00256k1.pdf]

## Supporting Information

### CO<sub>2</sub> Electroreduction on Nano-Cu-ZIF Grown inside Activated Carbon : Experimental and Computational Aspects

Santanu Jana<sup>a, ^</sup>, Gaurav Mukharjee<sup>a, ^</sup>, Asmita Dutta<sup>a</sup>, Hani Porat<sup>a</sup>, Aneena Lal<sup>a,b</sup>,  
Alon Khabra<sup>a</sup>, Itay Pitussi<sup>a</sup>, Arie Borenstein<sup>a, \*</sup>

a- Department of Chemical Sciences, Ariel University, Ariel, Israel

b- Institute of chemistry, The Hebrew University of Jerusalem, Jerusalem, Israel

<sup>^</sup>- Equally contributing authors

\* Corresponding author. Email: [arieb@ariel.ac.il](mailto:arieb@ariel.ac.il)

| <b>Tables</b>  |                                                                                                                                                                                            | <b>Page</b> |
|----------------|--------------------------------------------------------------------------------------------------------------------------------------------------------------------------------------------|-------------|
| Table S1       | Electrocatalytic performance of different MOF based catalysts for CO <sub>2</sub> RR                                                                                                       | S3          |
| Table S2       | Electrochemical Impedance Spectroscopy (EIS) measurement results                                                                                                                           | S4          |
| Table S3       | Energy, Zero Point Energy (ZPE), Entropy (T*S) values for Free Systems and CO <sub>2</sub> adsorption from Cu <sub>1</sub> to Cu <sub>12</sub> for Cu-MOF used in free energy calculations | S5          |
| Table S4       | Energy, Zero Point Energy (ZPE), Entropy (T*S) values for adsorbed species at Cu <sub>3</sub> site used in free energy calculations                                                        | S6          |
| Table S5       | Energy, Zero Point Energy (ZPE), Entropy (T*S) values for adsorbed species at Cu <sub>5</sub> site used in free energy calculations                                                        | S6          |
| Table S6       | Energy, Zero Point Energy (ZPE), Entropy (T*S) values for adsorbed species at Cu <sub>7</sub> site used in free energy calculations                                                        | S7          |
| <b>Figures</b> |                                                                                                                                                                                            |             |
| Figure S1      | SEM, SEM EDX                                                                                                                                                                               | S8          |
| Figure S2      | SEM-EDX Mapping images of Cu-ZIF@AC                                                                                                                                                        | S9          |
| Figure S3      | CV and LSV of AC, Chronoamperometry of AC and Cu-ZIF                                                                                                                                       | S10         |
| Figure S4      | Nyquist plots of Cu-ZIF@AC, Cu-ZIF, AC                                                                                                                                                     | S11         |
| Figure S5      | Chronoamperometry of Cu-ZIF@AC and NMR Spectra of                                                                                                                                          | S12         |

|            |                                                                                                                                                |     |
|------------|------------------------------------------------------------------------------------------------------------------------------------------------|-----|
|            | products at different potential                                                                                                                |     |
| Figure S6  | NMR Spectra of Products at different time of Chronoamperometry                                                                                 | S13 |
| Figure S7  | 12 hrs. chronoamperometry, pre/post electrolysis PXRD, GC calibration for AcOH, and Faradaic Efficiency of AcOH over 12 hrs. chronoamperometry | S14 |
| Figure S8  | Gas FTIR Spectra of Pure CO and gas collected over 30 minutes of Chronoamperometry of Cu-ZIF@AC                                                | S15 |
| Figure S9  | Structure of ZIF-8                                                                                                                             | S16 |
| Figure S10 | The adsorption reaction energies for CO <sub>2</sub> adsorption on Cu <sub>1</sub> to Cu <sub>12</sub> for Cu-MOF                              | S17 |
| Figure S11 | Free energy profile for CO <sub>2</sub> to CH <sub>3</sub> COOH on Cu-MOF at Cu <sub>3</sub> , Cu <sub>5</sub> , Cu <sub>7</sub> sites         | S17 |

## **Tables:**

**Table S1:** Electrocatalytic performance of different MOF based and other Cu based catalysts for CO<sub>2</sub>RR

| Material                                | Overpotential (vs. RHE) | Current Density (mA.cm <sup>-2</sup> ) | Major product                                   | F.E., Potential (vs. RHE)                                           | Ref.      |
|-----------------------------------------|-------------------------|----------------------------------------|-------------------------------------------------|---------------------------------------------------------------------|-----------|
| Ag-Cu (Ag-Cu-BTC) MOF-derived composite | -0.79 V                 | ~-20                                   | CO                                              | 65%, -1.8V                                                          | 1         |
| Cu-THQ / GO                             | -0.25 V                 | ~-3                                    | Formic acid                                     | 27%, -0.5V                                                          | 2         |
| CoPc-Cu-O @ carbon black                | -0.63 V                 | ~-17.3                                 | CO                                              | 79%, -0.74V                                                         | 3         |
| Cu-HHTT                                 | -0.60 V                 | ~-18.0                                 | CO                                              | 96.6%, -0.6V                                                        | 4         |
| MOF-545-Cu/PAN (MCP)                    | -0.8 V                  | ~-9.0                                  | CO                                              | 98%, -0.8V                                                          | 5         |
| Cu-Pc                                   | -1.6 V                  | ~-2.8                                  | C <sub>2</sub> H <sub>4</sub>                   | 25%, -1.6V                                                          | 6         |
| Cu <sub>3</sub> (BTC) <sub>2</sub>      | -1.5 V                  | ~-6.0                                  | CH <sub>4</sub> , C <sub>2</sub> H <sub>4</sub> | 17% (CH <sub>4</sub> ), 16% (C <sub>2</sub> H <sub>4</sub> ), -1.8V | 7         |
| Fe-TPP                                  | -1.0 V                  | ~-3.0                                  | CO                                              | 41%, -1.3V                                                          | 8         |
| HKUST-1/C                               | -1.0 V                  | ~-18.0                                 | HCOOH                                           | 42%, -0.3V                                                          | 9         |
| Cu-Cu <sub>2</sub> O-2                  | -0.4 V                  | ~-11.5                                 | AcOH, EtOH                                      | 48% (AcOH), 27.6% (EtOH), -0.4V                                     | 10        |
| Cu-BTZ                                  | -1.3V                   | ~-7.9                                  | AcOH                                            | 4.7%, -1.3V                                                         | 11        |
| CuO/Cu <sub>2</sub> O                   | -0.9V                   | ~-10.0                                 | AcOH                                            | 35.78%, -0.9V                                                       | 12        |
| Cu-ZIF@AC                               | -0.56 V                 | ~-10.0                                 | AcOH                                            | 71.5%, -0.3V                                                        | This work |

**Table S2:** Electrochemical Impedance Spectroscopy (EIS) measurement results for all the samples.

| <b>Material</b> | <b>R<sub>s</sub> (Ω)</b> | <b>R<sub>ct1</sub> (Ω)</b> | <b>CPE<sub>1</sub> (F)</b> | <b>R<sub>ct2</sub> (Ω)</b> | <b>CPE<sub>2</sub> (F)</b> |
|-----------------|--------------------------|----------------------------|----------------------------|----------------------------|----------------------------|
| Cu-ZIF@AC       | 7.1 ± 0.15               | 4.89 ± 0.54                | 0.01047 ± 0.002            | 237.06 ± 0.28              | 0.1360 ± 0.005             |
| Cu-ZIF          | 7.1 ± 0.38               | 133.98 ± 0.8               | 0.0004273 ± 0.0001         | 1053.54 ± 0.54             | 0.0022 ± 0.0003            |
| AC              | 7.1 ± 0.17               | 3.91 ± 0.36                | 0.00255 ± 0.0006           | 615.65 ± 0.3               | 0.0886 ± 0.003             |

R<sub>s</sub> = Solution resistance

R<sub>ct1</sub> = Charge transfer resistance at the catalyst-electrolyte interface

CPE<sub>1</sub> = Capacitance at the catalyst-electrolyte interface

R<sub>ct2</sub> = Diffusion limited resistance

CPE<sub>2</sub> = Capacitance on composite material

**Table S3:** Energy, Zero Point Energy (ZPE), Entropy (T\*S) values for Free Systems and CO<sub>2</sub> adsorption from Cu<sub>1</sub> to Cu<sub>12</sub> for Cu-MOF used in free energy calculations (T = 298.15 K).

| System                            | Energy (eV) | ZPE (eV) | T*S (eV) |
|-----------------------------------|-------------|----------|----------|
| Free H <sub>2</sub>               | 3.3705      | 0.1387   | 0.0560   |
| Free CO <sub>2</sub>              | -22.9549    | 0.3086   | 0.1351   |
| Free H <sub>2</sub> O             | -14.2185    | 0.5845   | 0.0789   |
| Free CH <sub>3</sub> COOH         | -46.76399   | 1.6244   | 0.1615   |
| Bulk Cu-MOF                       | -1756.1621  | 56.9270  | 7.8880   |
| Cu <sub>1</sub> @CO <sub>2</sub>  | -1779.3686  | 57.1823  | 8.0250   |
| Cu <sub>2</sub> @CO <sub>2</sub>  | -1779.6800  | 57.2484  | 8.0763   |
| Cu <sub>3</sub> @CO <sub>2</sub>  | -1779.7559  | 57.2941  | 8.1645   |
| Cu <sub>4</sub> @CO <sub>2</sub>  | -1779.5326  | 57.2734  | 8.1559   |
| Cu <sub>5</sub> @CO <sub>2</sub>  | -1779.5548  | 57.3218  | 8.2570   |
| Cu <sub>6</sub> @CO <sub>2</sub>  | -1779.5483  | 57.3016  | 8.1541   |
| Cu <sub>7</sub> @CO <sub>2</sub>  | -1779.3517  | 57.2839  | 8.0820   |
| Cu <sub>8</sub> @CO <sub>2</sub>  | -1779.4309  | 57.2883  | 8.1650   |
| Cu <sub>9</sub> @CO <sub>2</sub>  | -1779.4987  | 57.2594  | 8.1747   |
| Cu <sub>10</sub> @CO <sub>2</sub> | -1779.4518  | 57.1921  | 8.1002   |
| Cu <sub>11</sub> @CO <sub>2</sub> | -1779.5159  | 57.4556  | 7.9279   |
| Cu <sub>12</sub> @CO <sub>2</sub> | -1779.5309  | 57.2225  | 7.9003   |

**Table S4:** Energy, Zero Point Energy (ZPE), Entropy (T\*S) values for adsorbed species at Cu<sub>3</sub> site used in free energy calculations (T = 298.15 K).

| System                | Energy (eV) | ZPE (eV) | T*S (eV) |
|-----------------------|-------------|----------|----------|
| *OCHO                 | -1781.56    | 57.4522  | 8.2077   |
| *OCHOH                | -1786.87    | 57.7825  | 8.1330   |
| *CHO                  | -1773.9953  | 57.3350  | 8.2536   |
| *CHOH                 | -1776.8814  | 57.5270  | 8.0480   |
| *CH <sub>2</sub> OH   | -1782.9754  | 58.0582  | 7.8423   |
| *CH <sub>2</sub>      | -1770.6915  | 57.5796  | 7.8149   |
| *CH <sub>3</sub>      | -1776.4685  | 57.8989  | 8.0577   |
| *CH <sub>3</sub> COOH | -1804.0152  | 58.5360  | 8.2255   |

**Table S5:** Energy, Zero Point Energy (ZPE), Entropy (T\*S) values for adsorbed species at Cu<sub>5</sub> site used in free energy calculations (T = 298.15 K).

| System                | Energy (eV)    | ZPE (eV) | T*S (eV) |
|-----------------------|----------------|----------|----------|
| *OCHO                 | -1781.22980222 | 57.5540  | 7.9795   |
| *OCHOH                | -1786.28595098 | 57.8073  | 8.0869   |
| *CHO                  | -1773.44423226 | 57.2061  | 8.0743   |
| *CH <sub>2</sub> O    | -1778.78037319 | 57.6238  | 8.1258   |
| *CH <sub>2</sub> OH   | -1781.54046811 | 57.8840  | 8.0667   |
| *CH <sub>2</sub>      | -1768.42238507 | 57.4627  | 7.9226   |
| *CH <sub>3</sub>      | -1774.57171817 | 57.8548  | 7.9724   |
| *CH <sub>3</sub> COOH | -1803.42757475 | 58.4199  | 8.1957   |

**Table S6:** Energy, Zero Point Energy (ZPE), Entropy (T\*S) values for adsorbed species at Cu<sub>7</sub> site used in free energy calculations (T = 298.15 K).

| System                | Energy (eV) | ZPE (eV) | T*S (eV) |
|-----------------------|-------------|----------|----------|
| *COOH                 | -1782.7793  | 57.4990  | 7.9174   |
| *CO                   | -1771.5168  | 57.0601  | 8.0265   |
| *CHO                  | -1773.5940  | 57.2270  | 8.0029   |
| *CH <sub>2</sub> O    | -1778.9464  | 59.6941  | 8.1383   |
| *CH <sub>2</sub> OH   | -1782.2131  | 57.8535  | 7.9568   |
| *CH <sub>2</sub>      | -1768.7533  | 57.3626  | 7.9711   |
| *CH <sub>3</sub>      | -1774.9373  | 57.6676  | 7.9424   |
| *CH <sub>3</sub> COOH | -1803.6931  | 58.5710  | 8.1329   |

## Figures:

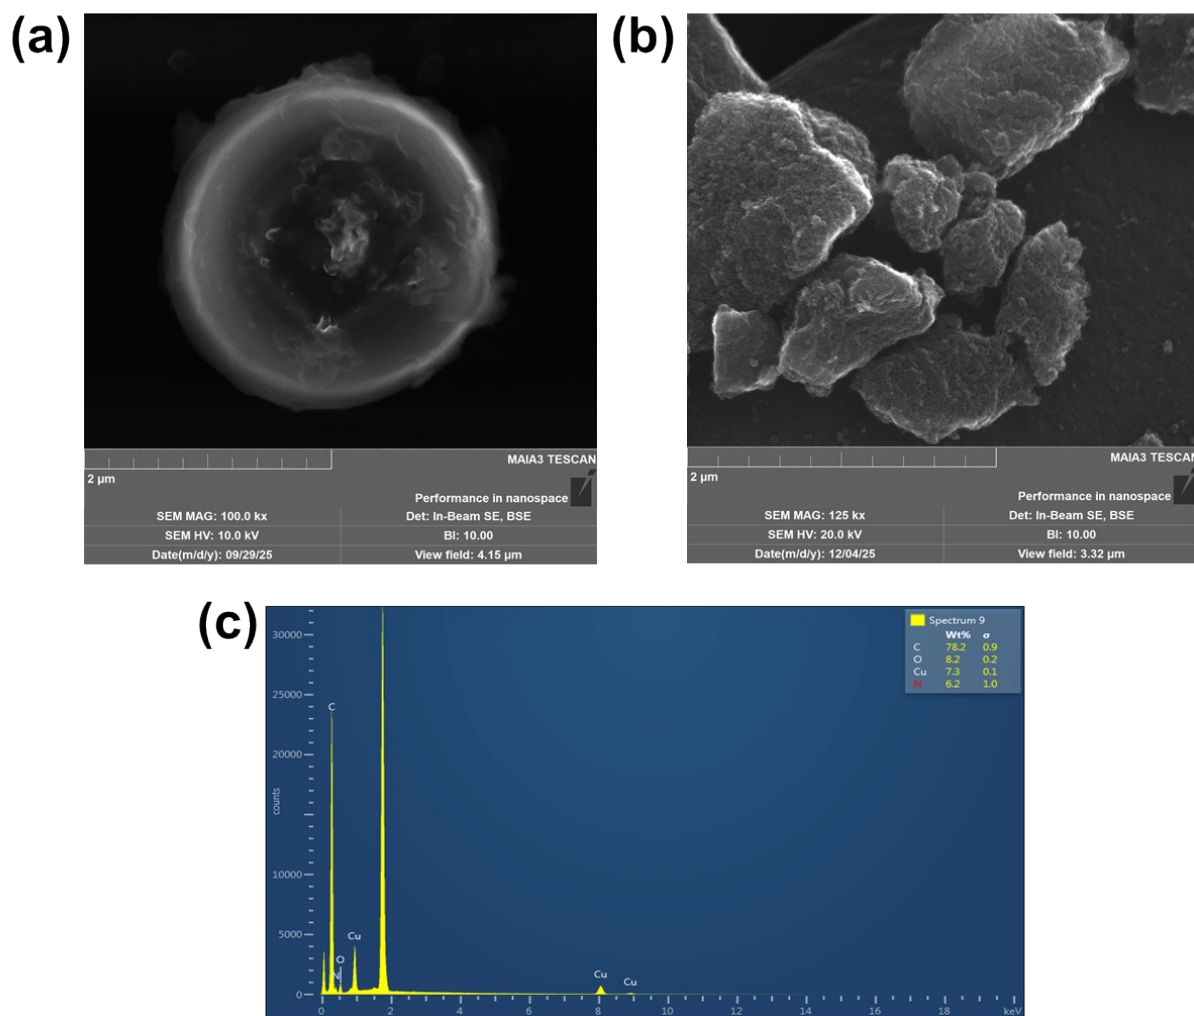

**Figure S1:** SEM images of pristine Cu-ZIF (a) and the Cu-ZIF@AC (b) are shown. In the composite, typical activated carbon particles are seen, with only minor MOF deposition observed on the surface, indicating that the MOF is predominantly confined within the carbon pores rather than on the external surface. The SEM-EDX elemental analysis is shown in (c).

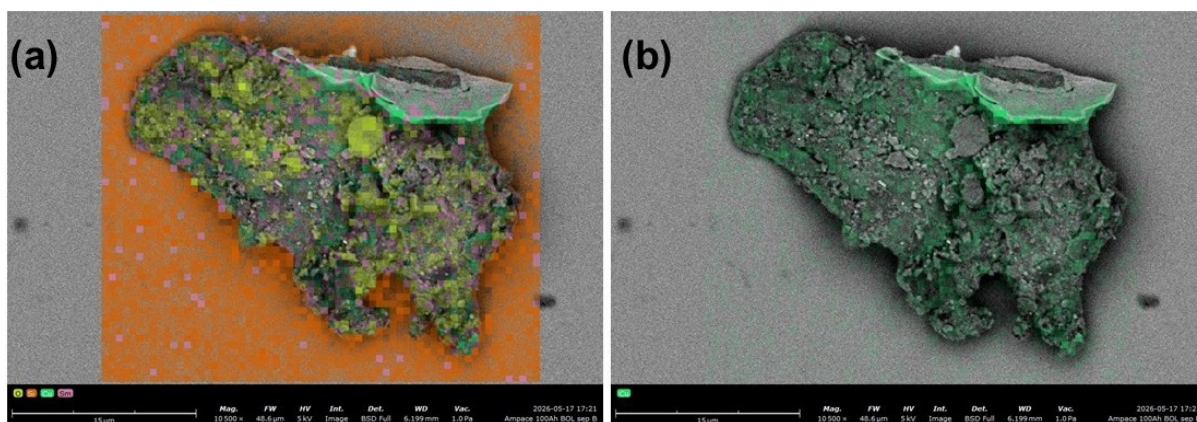

**Figure S2:** SEM-EDX Mapping images of Cu-ZIF@AC. The Cu elemental signal is uniformly distributed throughout the entire Activated Carbon without the presence of localized Cu-rich regions.

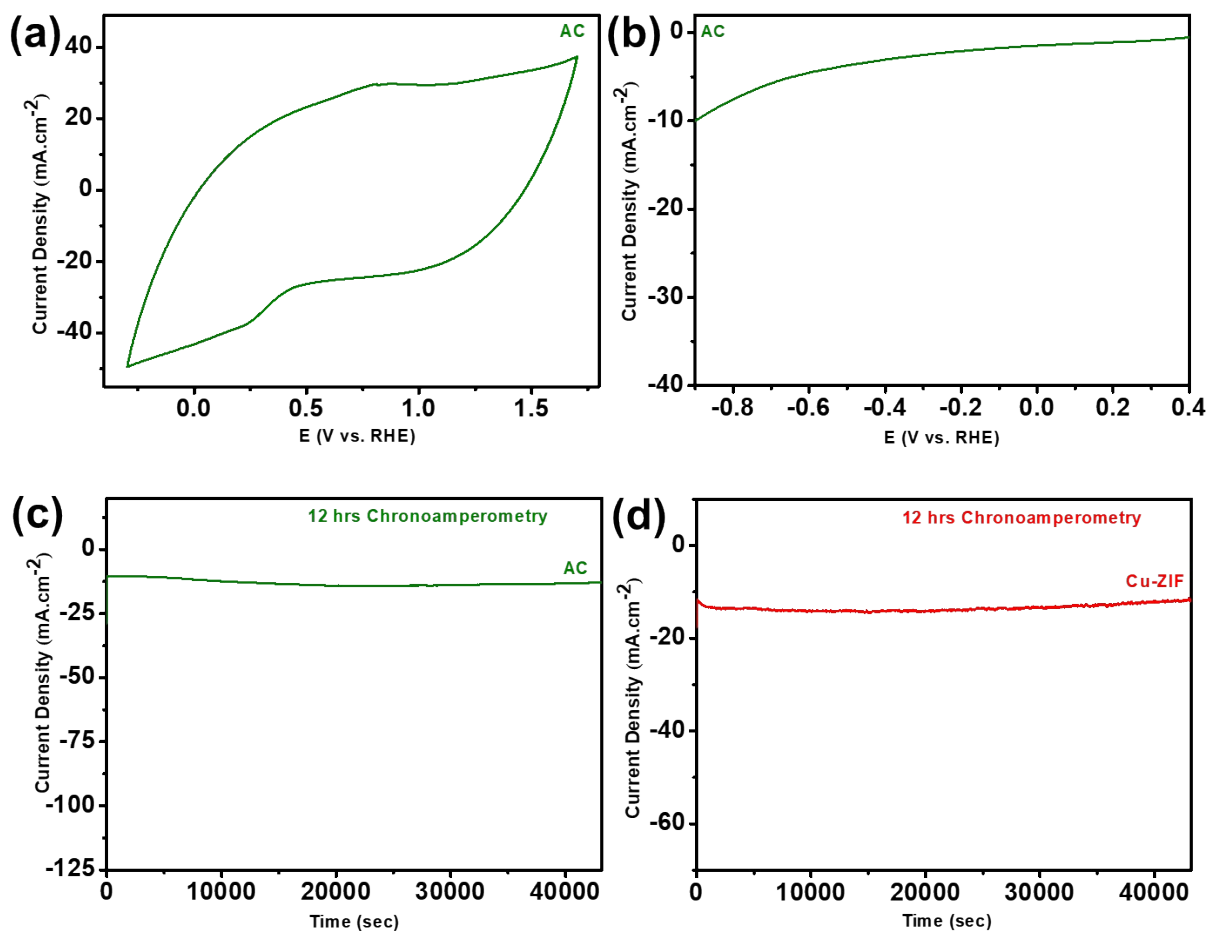

**Figure S3:** (a) Cyclic Voltammetry (CV) curve of activated carbon coated on  $1cm^2$  of carbon paper in  $N_2$  purged 0.5M  $Na_2SO_4$ ; (b) Linear Sweep Voltammetry (LSV) of Activated carbon in  $CO_2$  purged 0.5M  $KHCO_3$ ; (c) 12 hrs of stability test using Chronoamperometry for AC in  $CO_2$  saturated 0.5 M  $KHCO_3$  at constant potential of -0.9 V vs. RHE; (d) 12 hrs of stability test using Chronoamperometry for Cu-ZIF in  $CO_2$  saturated 0.5 M  $KHCO_3$  at constant potential of -0.72 V vs. RHE.

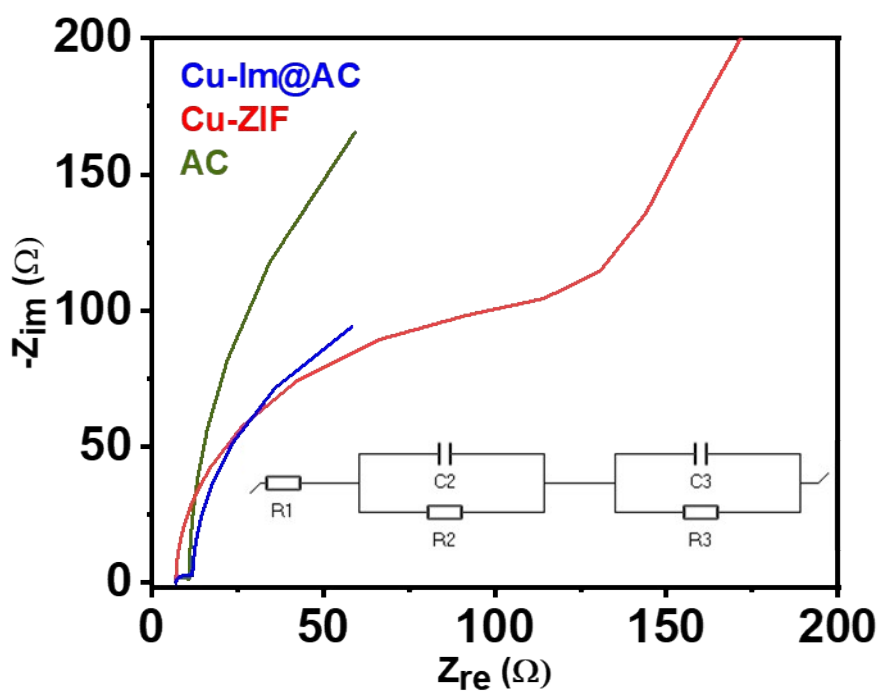

**Figure S4:** Nyquist plots of Cu-ZIF@AC, Cu-ZIF, AC along with the fitted curves obtained from Electrochemical Impedance Spectroscopy (EIS) measured in  $\text{CO}_2$  purged 0.5M  $\text{KHCO}_3$  using the equivalent circuit model shown inset, where  $R_1$  = Solution resistance;  $R_2$  = Charge transfer resistance at the catalyst-electrolyte interface;  $C_2$  = Capacitance at the catalyst-electrolyte interface;  $R_3$  = Diffusion limited resistance;  $C_3$  = Capacitance on composite material.

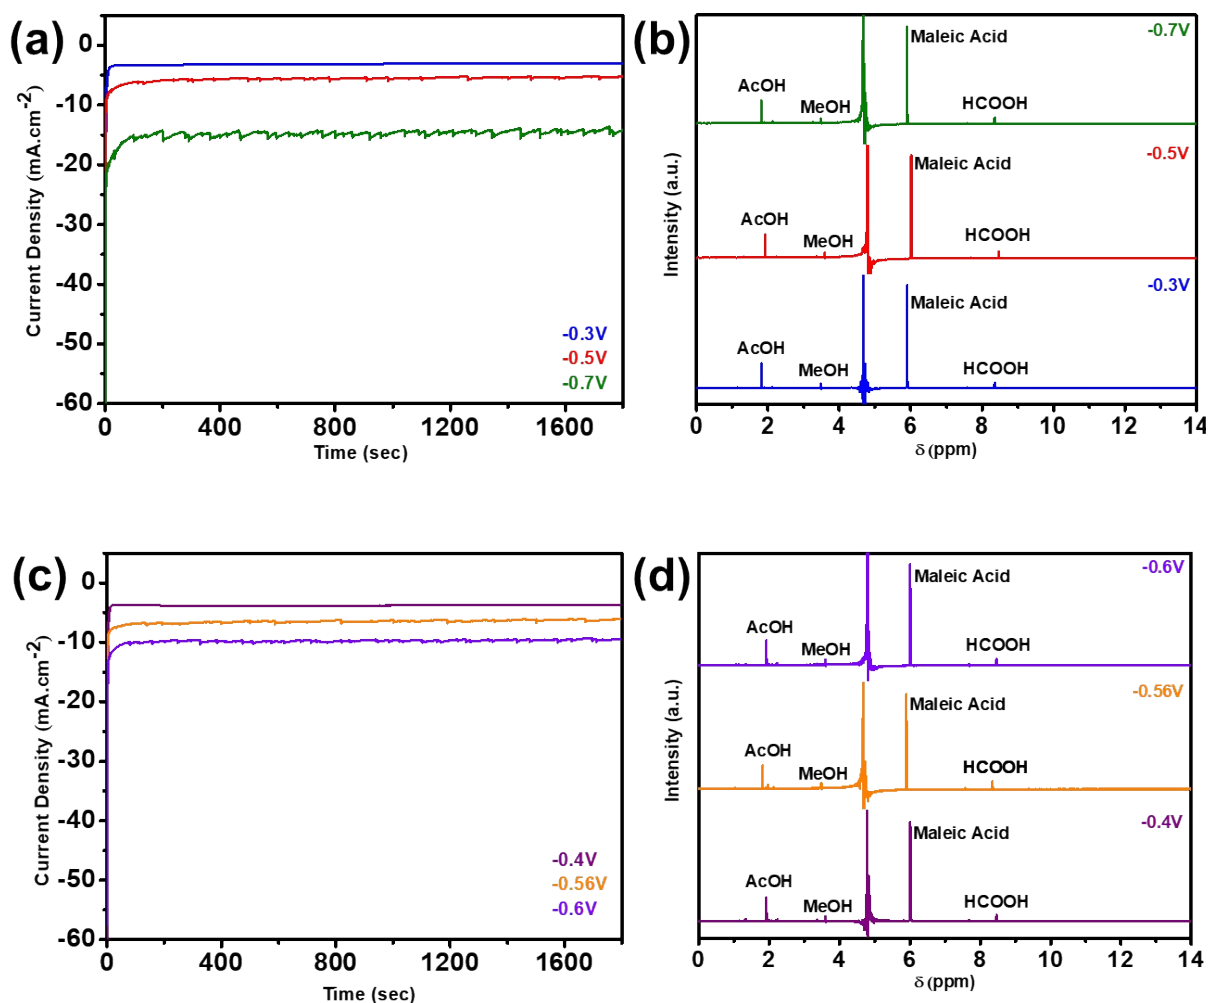

**Figure S5:** Chronoamperometry plots (a), (c) of Cu-ZIF@AC coated on carbon paper electrode at different potentials (vs. RHE) in CO<sub>2</sub> purged 0.5M KHCO<sub>3</sub> electrolyte are shown. The NMR spectra (b), (d) of the products were analysed using 400 MHz NMR after collection of electrolytes at 30 minutes of Chronoamperometry where Maleic acid was used as internal standard.

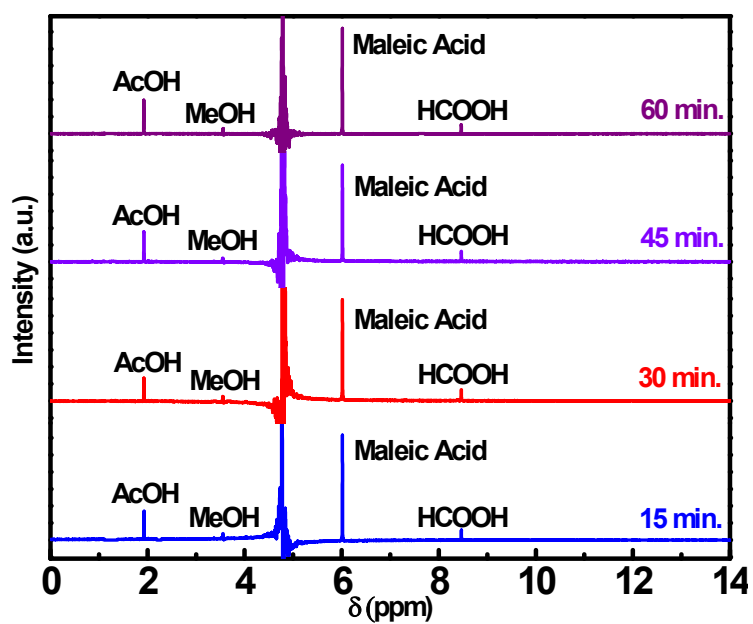

**Figure S6:** The NMR spectra of the products were analysed using 400 MHz NMR after collection of electrolytes at 15-60 minutes of Chronoamperometry at -0.3 V vs. RHE where Maleic acid was used as internal standard.

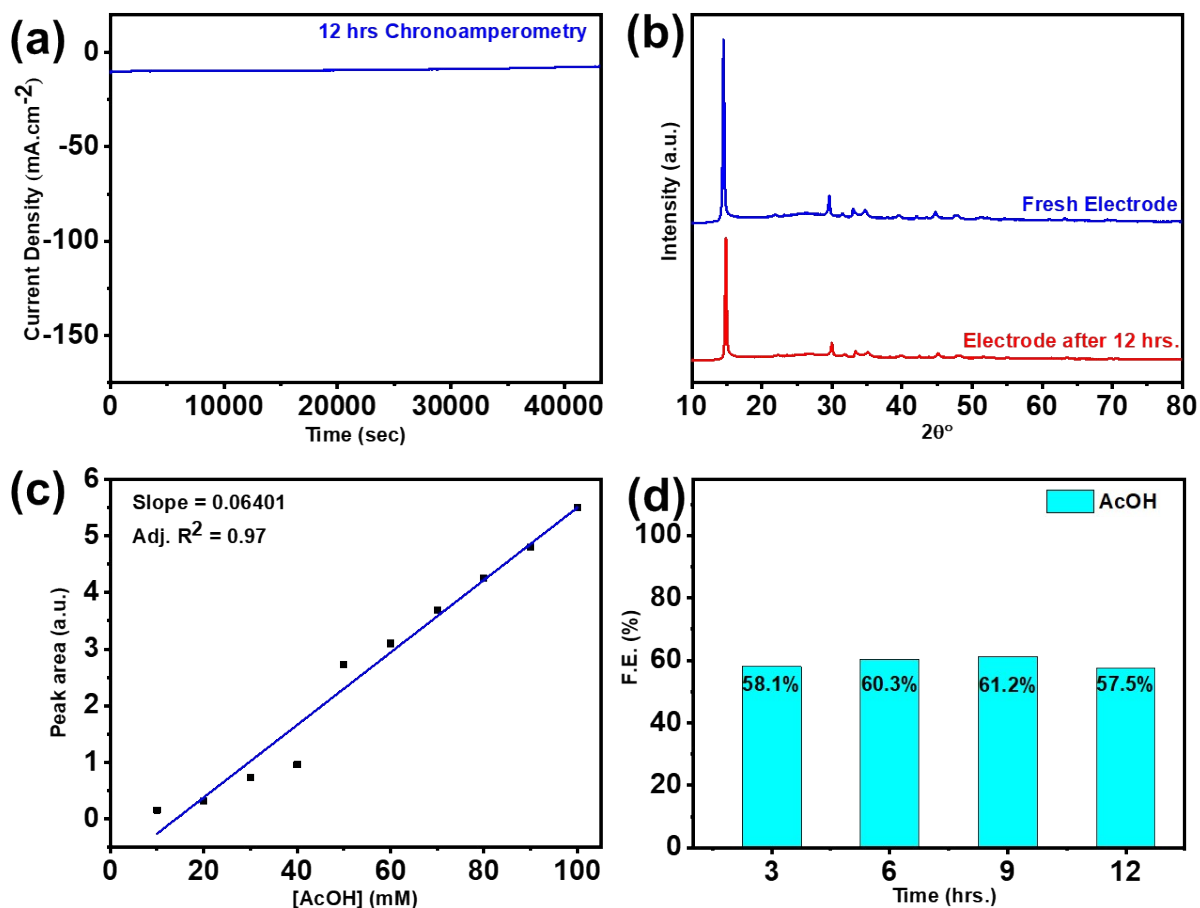

**Figure S7:** (a) 12 hrs of stability test using Chronoamperometry for Cu-ZIF@AC in  $\text{CO}_2$  saturated 0.5 M  $\text{KHCO}_3$  at constant potential of  $-0.56 \text{ V}$  vs. RHE exhibiting stable  $10 \text{ mA}\cdot\text{cm}^{-2}$  current density; (b) PXRD data of Cu-ZIF@AC before and after 12 hrs. of Chronoamperometry; (c) Calibration curve for AcOH using Gas Chromatography; (d) Faradaic Efficiency (F.E.) at different time intervals during the 12 h chronoamperometry.

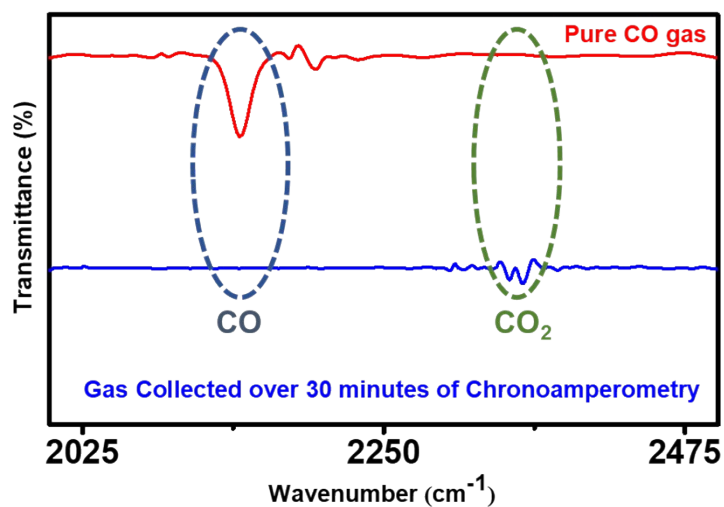

**Figure S8:** The Gas FTIR Spectra of Pure CO and gas collected over 30 minutes of Chronoamperometry of Cu-ZIF@AC at -0.3V vs. RHE in CO<sub>2</sub> purged 0.5M KHCO<sub>3</sub> solution. The corresponding CO and CO<sub>2</sub> peaks are shown here. The CO<sub>2</sub> peak arises due to purging of CO<sub>2</sub> in 0.5M KHCO<sub>3</sub> solution before Chronoamperometry.

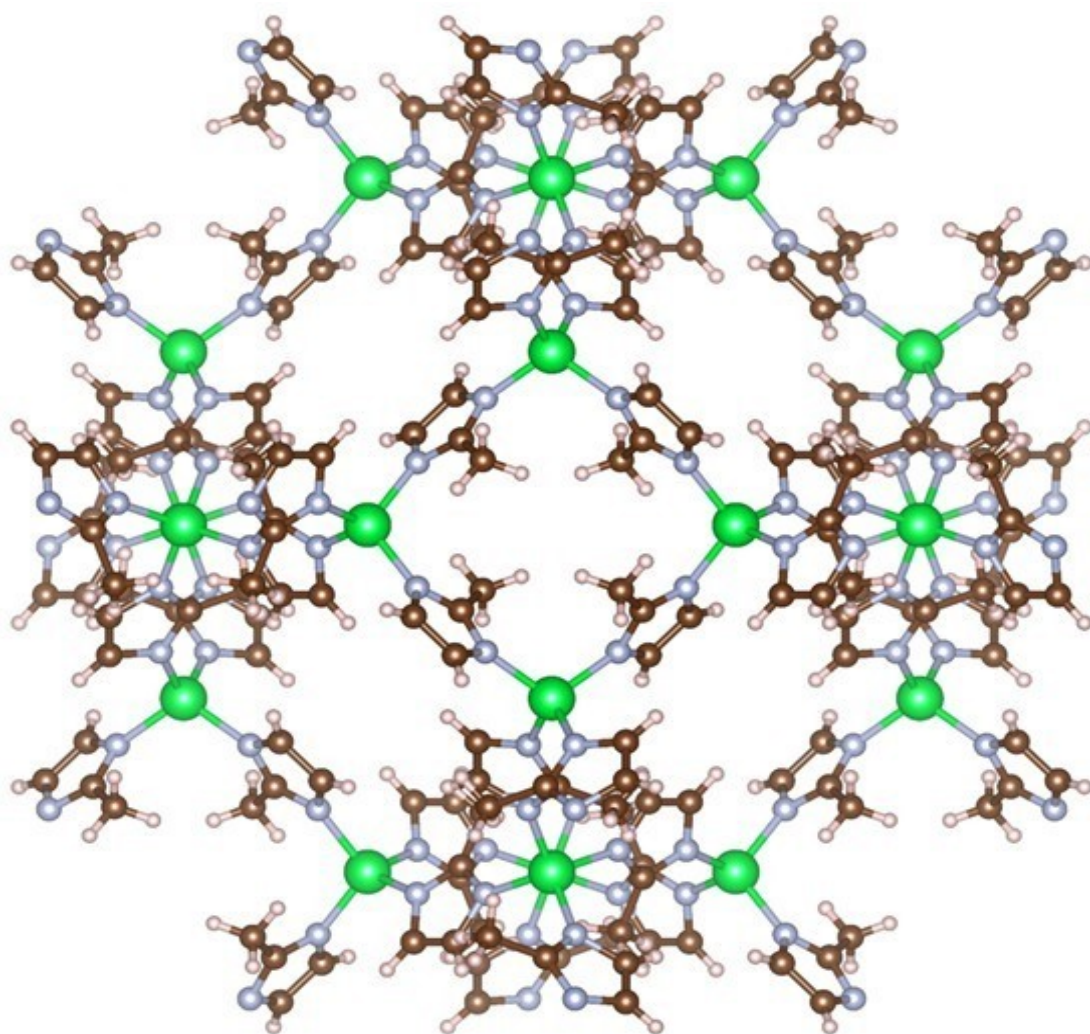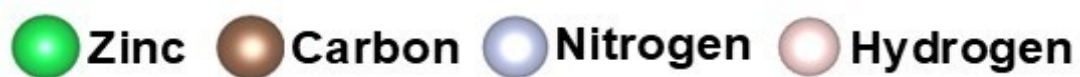

**Figure S9:** - Structure of ZIF-8.

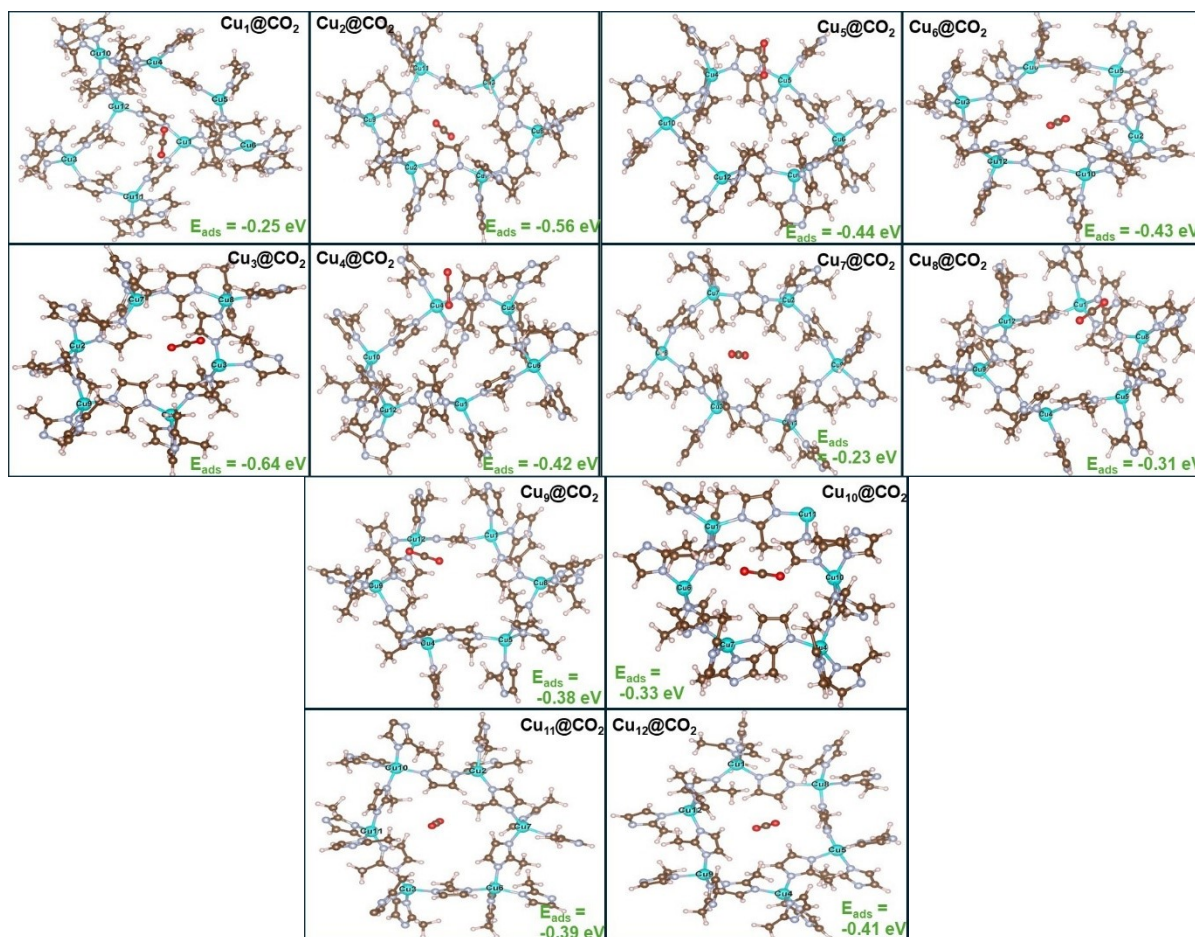

**Figure S10:** - The adsorption reaction energies for CO<sub>2</sub> adsorption on Cu<sub>1</sub> to Cu<sub>12</sub> for Cu-ZIF.

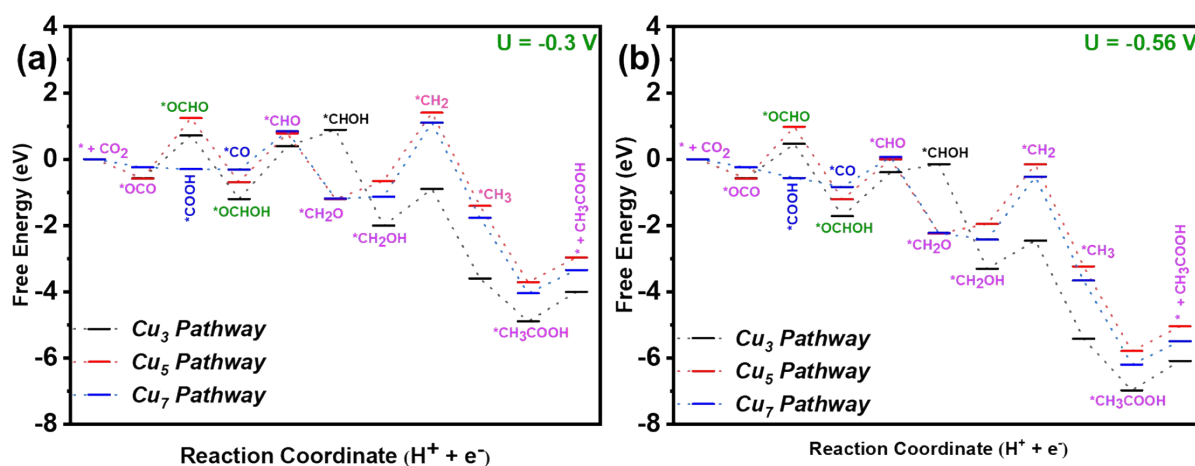

**Figure S11:** Free energy profile for CO<sub>2</sub> to CH<sub>3</sub>COOH on Cu-ZIF at Cu<sub>3</sub>, Cu<sub>5</sub>, Cu<sub>7</sub> sites (a) -0.3 V and (b) -0.56 V. Black, Red, Blue legends represent the CH<sub>3</sub>COOH pathway for Cu<sub>3</sub>, Cu<sub>7</sub>, Cu<sub>5</sub> copper adsorbing sites in the Cu-ZIF, respectively.

## References

- (1) Nambi, A.; Chatzitakis, A.; Olsbye, U.; Hjelm, J.; Zhao, Y.; Kaiser, A. Gas-Phase Electrochemical CO<sub>2</sub> Reduction on Silver-Copper BTC MOF in a Zero-Gap Membrane Electrode Assembly. *Electrochim. Acta* **2024**, *506*, 144763.
- (2) Jia, L.; Wagner, K.; Smyth, J.; Officer, D.; Chen, J.; Wagner, P. Cu-THQ-EFG Composite for Highly Selective Electrochemical CO<sub>2</sub> Reduction to Formate at Low Overpotentials. *Polymers (Basel)*. **2022**, *14* (23), 5112.
- (3) Meng, Z.; Luo, J.; Li, W.; Mirica, K. A. Hierarchical Tuning of the Performance of Electrochemical Carbon Dioxide Reduction Using Conductive Two-Dimensional Metallophthalocyanine Based Metal–Organic Frameworks. *J. Am. Chem. Soc.* **2020**, *142* (52), 21656–21669.
- (4) Xue, H.; Zhu, H.; Huang, J.; Liao, P.; Chen, X. Ultrathin Two-Dimensional Triptycene-Based Metal-Organic Framework for Highly Selective CO<sub>2</sub> Electroreduction to CO. *Chinese Chemical Letters* **2023**, *34* (1), 107134.
- (5) Xin, Z.; Yuan, Z.; Liu, J.; Wang, X.; Shen, K.; Chen, Y.; Lan, Y.-Q. Cu Cluster Embedded Porous Nanofibers for High-Performance CO<sub>2</sub> Electroreduction. *Chinese Chemical Letters* **2023**, *34* (4), 107458.
- (6) Kusama, S.; Saito, T.; Hashiba, H.; Sakai, A.; Yotsuhashi, S. Crystalline Copper(II) Phthalocyanine Catalysts for Electrochemical Reduction of Carbon Dioxide in Aqueous Media. *ACS Catal.* **2017**, *7* (12), 8382–8385.
- (7) Qiu, Y.-L.; Zhong, H.-X.; Zhang, T.-T.; Xu, W.-B.; Su, P.-P.; Li, X.-F.; Zhang, H.-M. Selective Electrochemical Reduction of Carbon Dioxide Using Cu Based Metal Organic Framework for CO<sub>2</sub> Capture. *ACS Appl. Mater. Interfaces* **2018**, *10* (3), 2480–2489.
- (8) Hod, I.; Sampson, M. D.; Deria, P.; Kubiak, C. P.; Farha, O. K.; Hupp, J. T. Fe-Porphyrin-Based Metal–Organic Framework Films as High-Surface Concentration, Heterogeneous Catalysts for Electrochemical Reduction of CO<sub>2</sub>. *ACS Catal.* **2015**, *5* (11), 6302–6309.
- (9) Sathiyam, K.; Dutta, A.; Marks, V.; Fleker, O.; Zidki, T.; Webster, R. D.; Borenstein, A. Nano-Encapsulation: Overcoming Conductivity Limitations by Growing MOF Nanoparticles in Meso-Porous Carbon Enables High Electrocatalytic Performance. *NPG Asia Mater.* **2023**, *15* (1), 18.
- (10) Zhu, Q.; Sun, X.; Yang, D.; Ma, J.; Kang, X.; Zheng, L.; Zhang, J.; Wu, Z.; Han, B. Carbon Dioxide Electroreduction to C<sub>2</sub> Products over Copper-Cuprous Oxide Derived from Electrosynthesized Copper Complex. *Nat. Commun.* **2019**, *10* (1), 3851.
- (11) Zhu, H.-L.; Chen, H.-Y.; Han, Y.-X.; Zhao, Z.-H.; Liao, P.-Q.; Chen, X.-M. A Porous π–π Stacking Framework with Dicopper(I) Sites and Adjacent Proton

- Relays for Electroreduction of CO<sub>2</sub> to C<sub>2+</sub> Products. *J. Am. Chem. Soc.* **2022**, *144* (29), 13319–13326.
- (12) Zhang, K.; Chen, S.; Ge, Y.; Zhang, X.; Zhang, Z.; Ye, C.; Pan, G.; Hu, L. CuO/Cu<sub>2</sub>O Catalyst with Adjustable Cu(II)/Cu(I) for Selective CO<sub>2</sub> Electroreduction to Acetate. *ACS Appl. Nano Mater.* **2025**, *8* (46), 22285–22294.
